# Supplementary material for: Sleep Architecture, Obstructive Sleep Apnea, and Cognitive Function in Adults
Source: PubMed Central journal article supplement (PMC10354680; doi:10.1001/jamanetworkopen.2023.25152), 2023-07-18
Supplement: jamanetwopen-e2325152-s002.pdf [file jamanetwopen-e2325152-s002.pdf]

## Data Sharing Statement

Pase. Sleep Architecture, Obstructive Sleep Apnea, and Cognitive Function in Adults.  
*JAMA Netw Open*. Published online July 18, 2023. doi:10.1001/  
jamanetworkopen.2023.25152

### Data

**Data available:** Yes

**Data types:** Deidentified participant data

**How to access data:** Sleep data can be requested from NSRR: <https://sleepdata.org/>  
Cognitive data can be requested from each participating cohort or from resources such as  
BioLINCC: <https://biolincc.nhlbi.nih.gov/home/>

**When available:** beginning date: 03-31-2024

### Supporting Documents

**Document types:** None

### Additional Information

**Who can access the data:** researchers whose proposed use of the data has been approved

**Types of analyses:** For any purpose, pending site approval

**Mechanisms of data availability:** After approval of a proposal, or with a signed data access agreement
